# Supplementary material
Source: bioRxiv or medRxiv preprint supplement (https://medrxiv.org/highwire/filestream/84790/field_highwire_adjunct_files/1/2020.06.05.20122978-2.pdf)

# Supplementary Figures

**Supplementary Figure 1.** Scatter plots for each of the cognitive tasks associated (FDR < 0.05) with predicted C4A expression. Box plots for each 'bin' of distinct predicted C4A expression values are also shown. Values for the cognitive tasks are plotted on the y-axis and predicted C4A expression (C4exp\_val) is plotted on the x-axis.

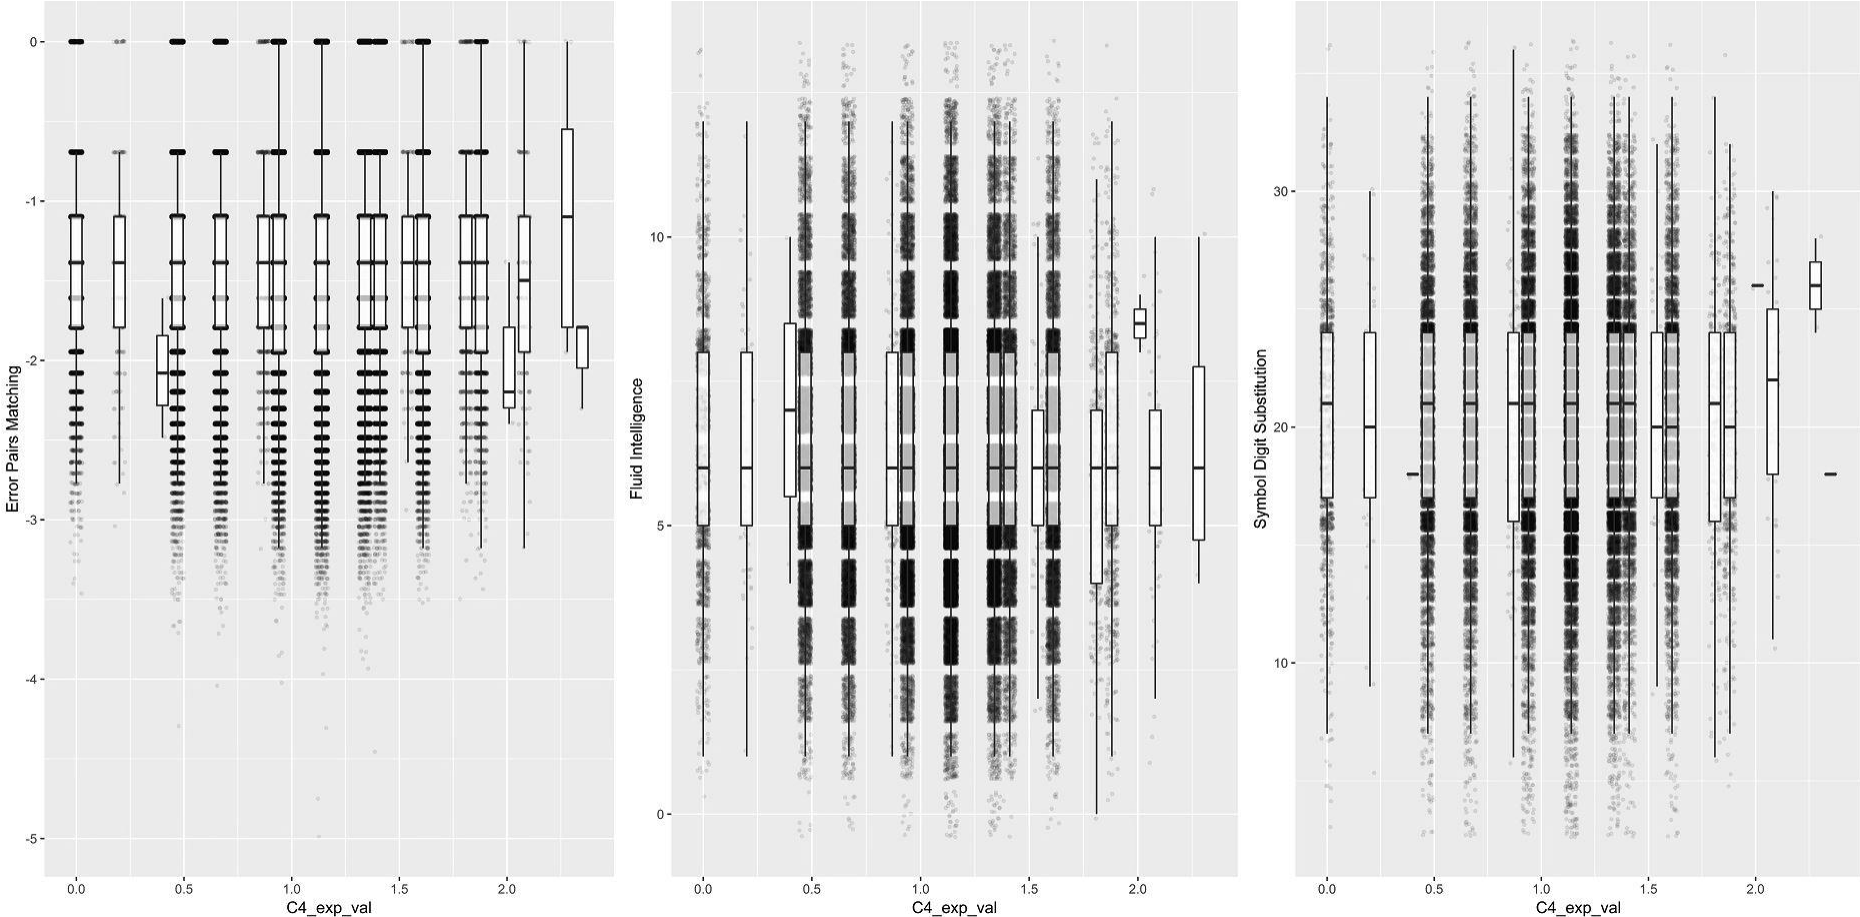

**Supplementary Figure 2.** Scatter plots for each of the regional cortical surface area measures associated (FDR < 0.05) with predicted C4A expression. Box plots for each 'bin' of distinct predicted C4A expression values are also shown. Values for cortical surface area are plotted on the y-axis and predicted C4A expression (C4exp\_val) is plotted on the x-axis.

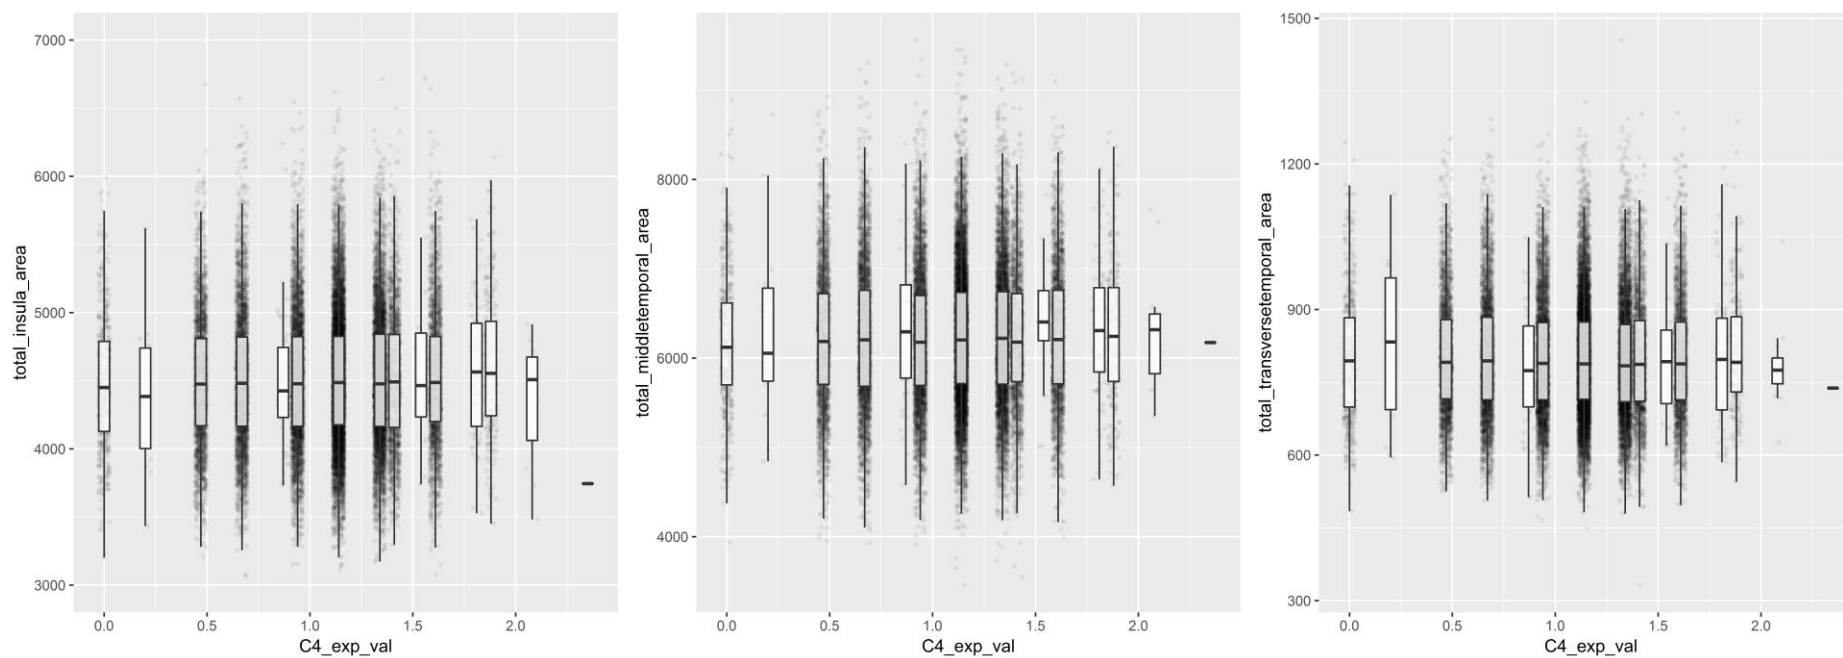

**Supplementary Figure 3.** Scatter plots for each of the regional cortical thickness measures associated (FDR < 0.05) with predicted C4A expression. Box plots for each 'bin' of distinct predicted C4A expression values are also shown. Values for mean cortical thickness are plotted on the y-axis and predicted C4A expression (C4exp\_val) is plotted on the x-axis.

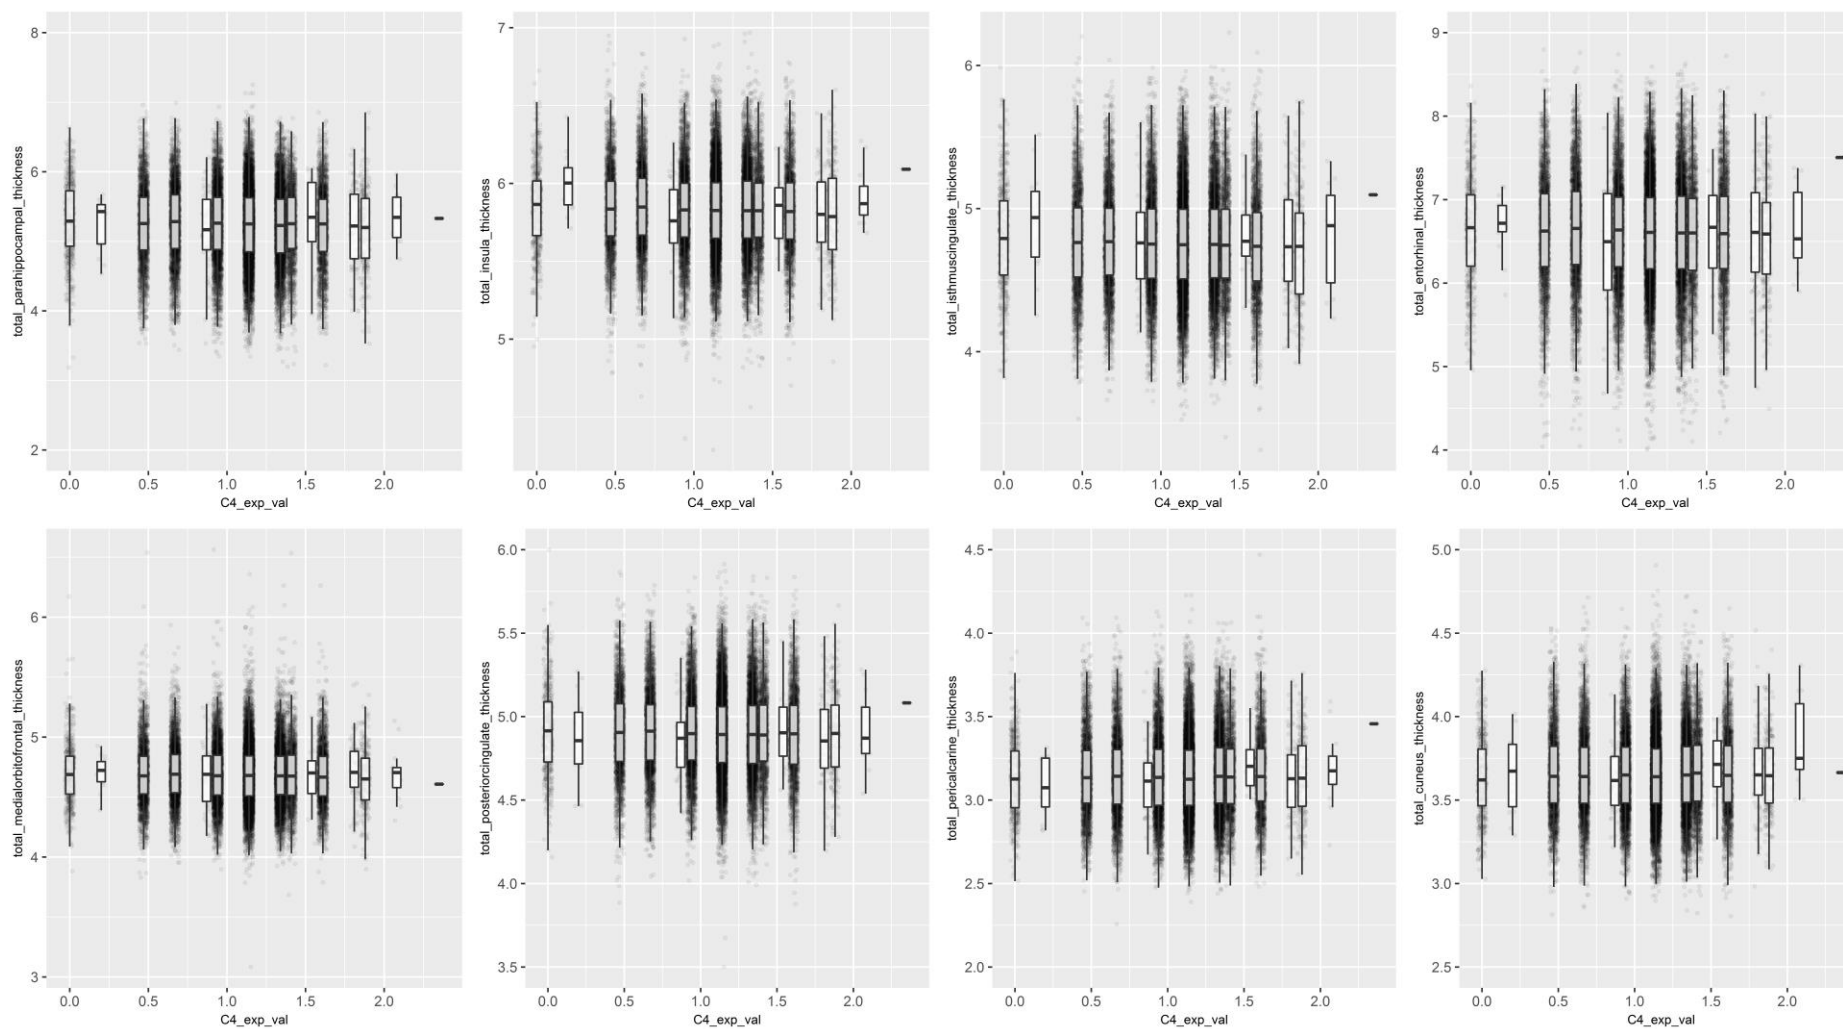

**Supplementary Figure 4.** Histograms showing the distribution of predicted *C4A* expression values in (A) the full UK Biobank cohort (n = 329,773) and (B) in the subset of the UK Biobank cohort with available imaging data (n = 27,087).

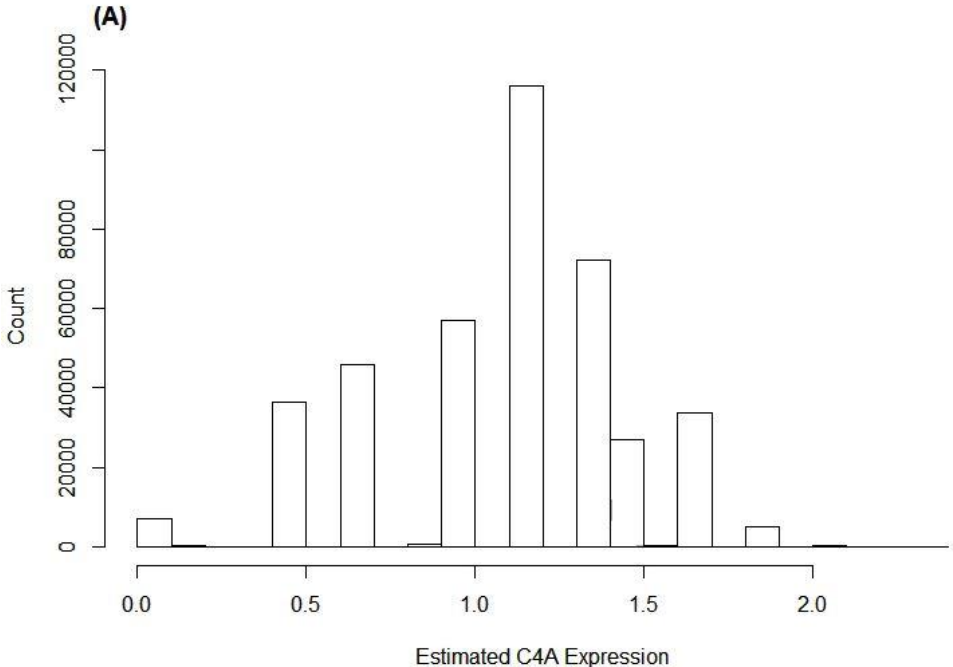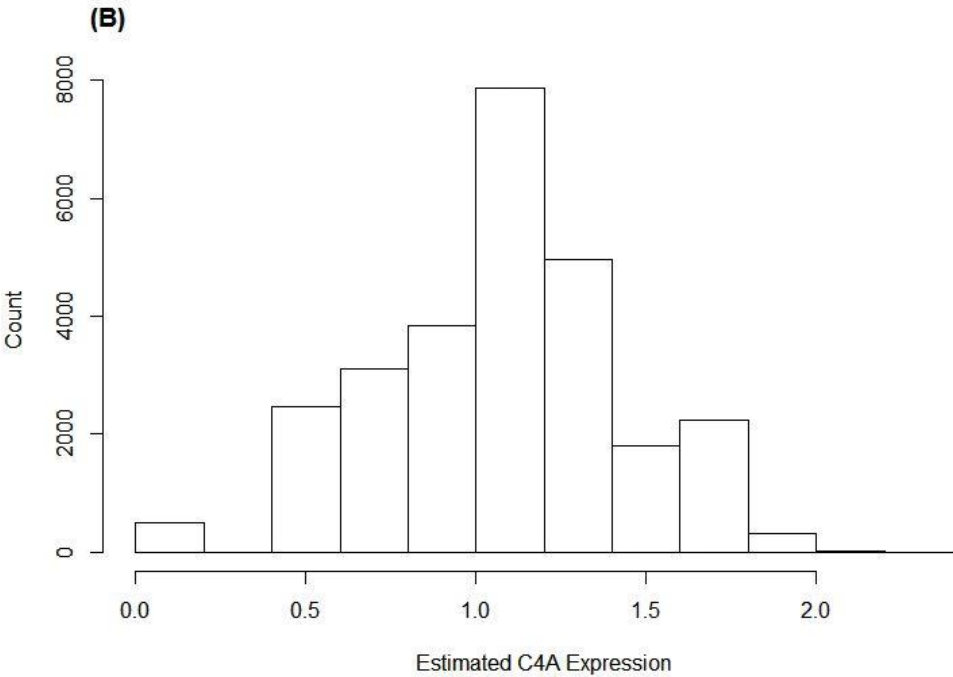

Supplement: Supplementary file [file 2020.06.05.20122978-2.pdf]
